# Supplementary material
Source: PubMed Central journal article supplement (PMC8111698)
Supplement: NIHMS1692789-supplement-4.pdf [file NIHMS1692789-supplement-4.pdf]

**SUPPLEMENTARY MATERIALS FOR:**

**Physiologically relevant oxygen tensions differentially regulate hepatotoxic responses, gene induction and CYP1A activity in HepG2 cells**

Thomas J. DiProspero <sup>a</sup>, Erin Dalrymple <sup>a</sup>, and Matthew R. Lockett <sup>a,b\*</sup>

<sup>a</sup> Department of Chemistry, University of North Carolina at Chapel Hill, Kenan and Caudill Laboratories, Chapel Hill, North Carolina 27599-3290

<sup>b</sup> Lineberger Comprehensive Cancer Center, University of North Carolina at Chapel Hill, 450 West Drive, Chapel Hill, North Carolina 27599-7295

\* Corresponding author: [mlockett@unc.edu](mailto:mlockett@unc.edu)

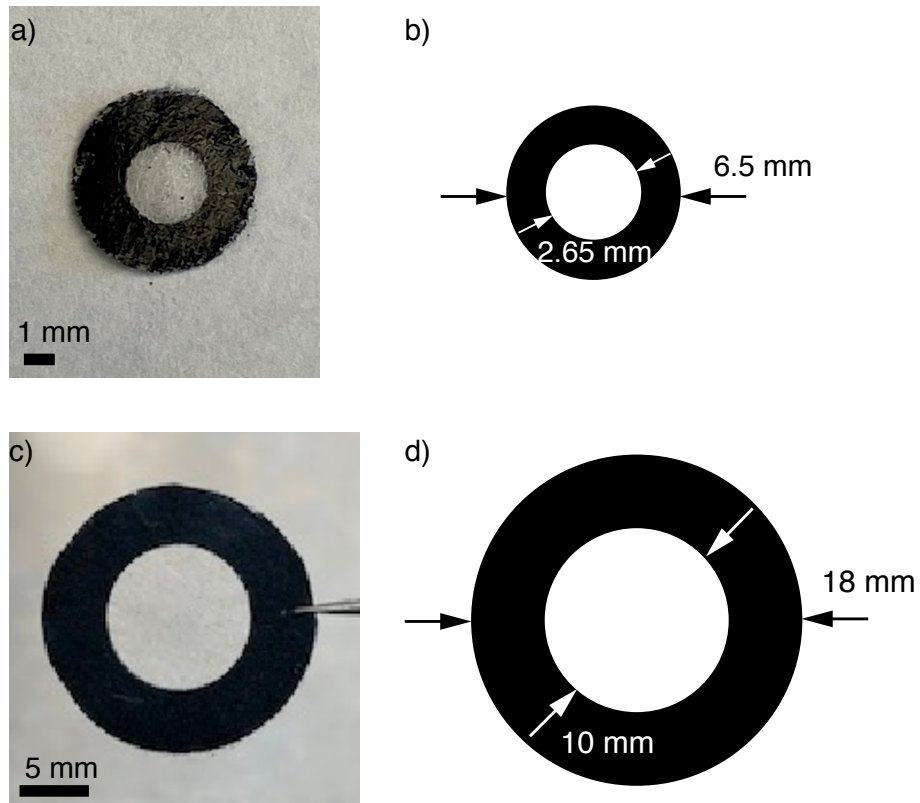

**Figure S1.** Photographs and schematics of the small and large zone paper scaffolds used in this work. Both scaffolds were drawn with Adobe Illustrator. The designs were patterned onto Whatman 105 lens paper with a Xerox ColorQube 8650 wax printer. (a) Photograph and (b) schematic of a small single zone scaffold, which contained a 2.65 mm seeding region surrounded by a 1.925 mm thick border. (c) Photograph and (d) schematic of a large single zone scaffold, which contained a 10 mm seeding region surrounded by a 4 mm thick border.

a.

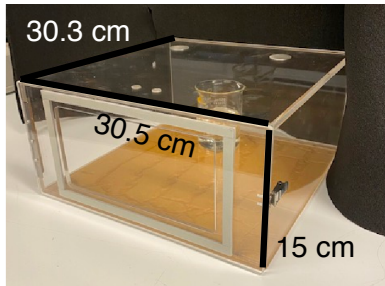

b.

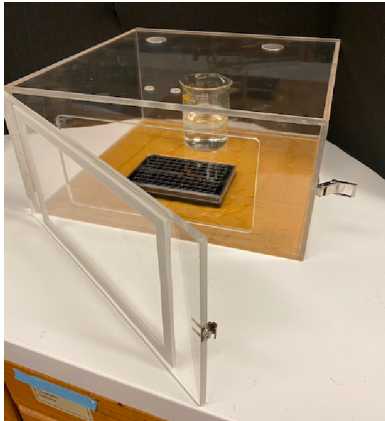

c.

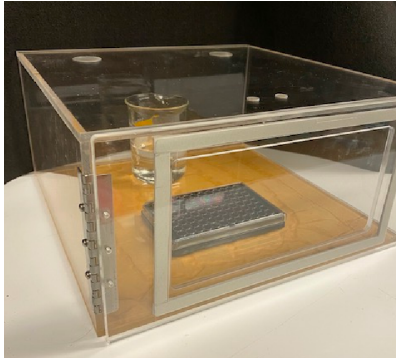

**Figure S2.** Photographs of a home-built hypoxia chamber assembled from 0.635 cm-thick cast acrylic sheets. (a) The 30.5 x 30.3 x 15 cm chamber contains a (b) 20.3 x 10.3 cm A latched door on the front face. The door was fitted with a 0.32 x 0.95 cm (W x H) thick foam gasket to form an airtight seal. (c) The chamber's top face contained two 2.9 cm-diameter holes, where CO<sub>2</sub> and O<sub>2</sub> gas sensor were mounted.

**Table S1.** Table of primer sequences for qPCR

| Gene            | Forward Primer (5' – 3') | T <sub>m</sub> (°C) | Reverse Primer (5' – 3')    | T <sub>m</sub> (°C) | Conc. (nM) | Efficiency (%) |
|-----------------|--------------------------|---------------------|-----------------------------|---------------------|------------|----------------|
| <i>β</i> -Actin | CTGGCACCCAGCACAATG       | 57.1                | GCCGATCCACACGGAGTACT        | 59.1                | 800        | 99.28          |
| GAPDH           | GAGTCCACTGGCGTCTTCAC     | 62.1                | GGTGCTAAGCAGTTGGTGGT        | 65.5                | 800        | 115.36         |
| CYP1A1          | GCACAGAGGTAGTCTCACTGCTTG | 59.3                | AAGGGCAGAGGAATGTGATGTT      | 56.7                | 600        | 102.06         |
| CYP1A2          | CTTCGGACAGCACTTCCCTG     | 62.2                | AGGGTTAGGCAGGTAGCGAA        | 65.7                | 400        | 119.44         |
| CYP2E1          | TTGAAGCCTCTCGTTGACCC     | 61.6                | CGTGGTGGGATACAGCCAA         | 65.0                | 600        | 98.61          |
| CYP3A4          | CTTCATCCAATGGACTGCATAAAT | 53.6                | TCCCAAGTATAAACTCTACACAGACAA | 57.1                | 100        | 97.37          |
| UGT1A1          | TGACGCCTCGTTGTACATCAG    | 61.0                | CCTCCCTTTGGAATGGCAC         | 63.8                | 400        | 98.57          |
| UGT1A6          | AGCCCAGACCCTGTGTCCTA     | 64.4                | CCACTCGTTGGGAAAAGTCA        | 60.2                | 400        | 107.17         |
| SULT1A1         | GTCACCGAGCTCCCATCTTC     | 61.7                | GTCTCCATCCCTGAGGGAATC       | 61.1                | 200        | 97.66          |
| SULT1E1         | TGGTGGCTGGTCATCCAAA      | 61.3                | GAACCTGTCCTTGCATGAATTC      | 59.7                | 200        | 105.26         |
| SULT2A1         | TCCAGTTATTCCCAAGTCTTTCT  | 61.1                | AAACATCTCTGGGATTTCTCATGAG   | 60.2                | 600        | 95.41          |
| AhR             | ACATCACCTACGCCAGTCGC     | 64.1                | TCTATGCCGCTTGAAGGAT         | 64.3                | 600        | 86.27          |

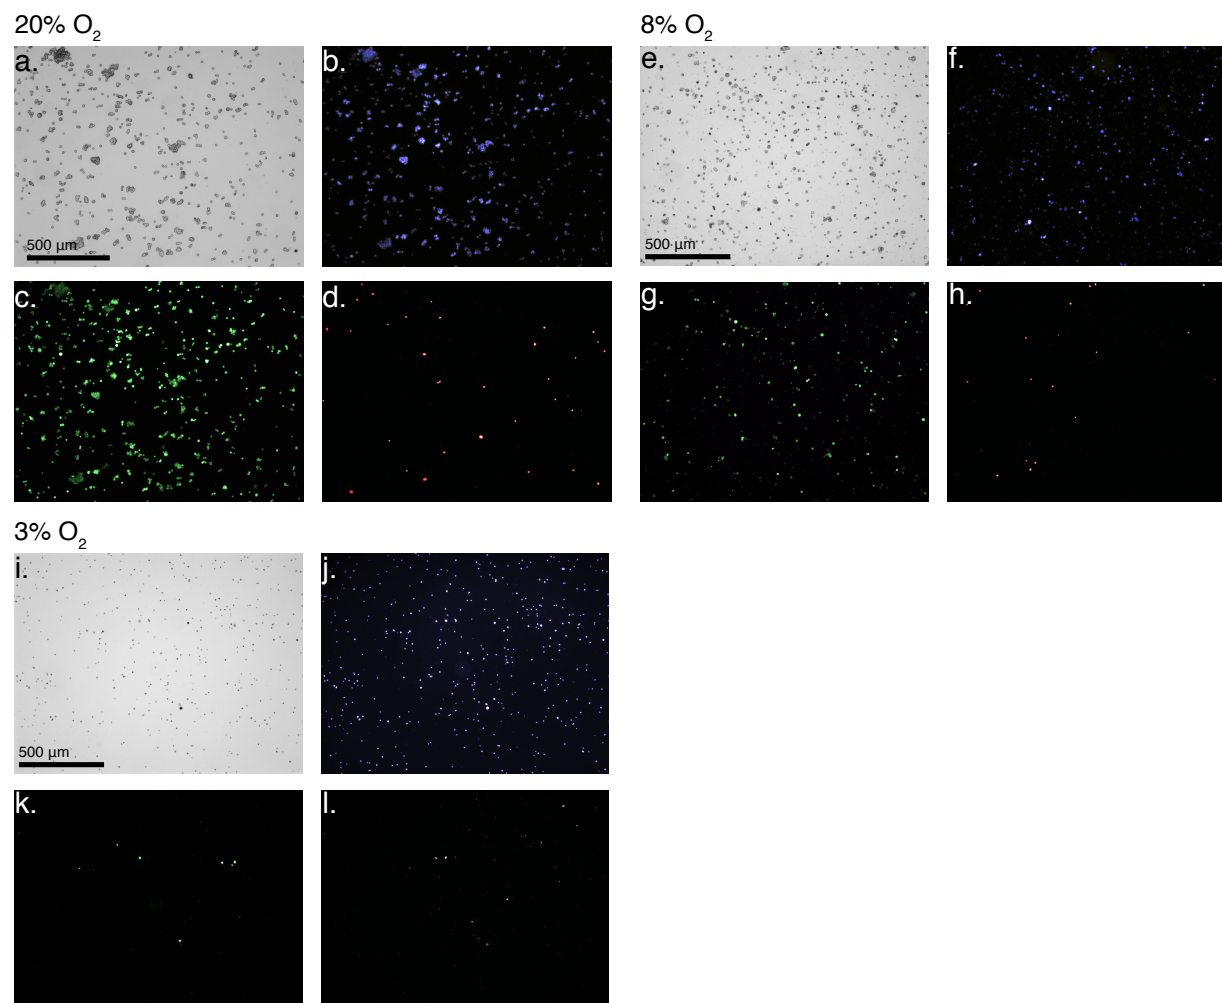

**Figure S3.** Representative widefield images of HepG2 cells stained with calcein-AM, propidium iodide (PI), and Hoechst 33342 after a 48 h exposure to 20% (a-d), 8% (e-h), or 3% (i-l) oxygen.

**Image acquisition:** The cells were imaged with a Nikon TE-2000i microscope equipped with a QICAM Fast 1394 digital camera (QImaging). Images were collected with a 10x objective. Calcein-labeled cells were imaged with a filter cube containing a  $470 \pm 20$  nm excitation filter, a  $525 \pm 25$  nm emission filter, and a 495 nm dichroic mirror. PI-labeled cells were imaged with a filter cube containing a  $560 \pm 20$  nm excitation filter, a  $630 \pm 35$  nm emission filter, and a 585 nm dichroic mirror. Hoechst-labeled cells were imaged with a filter cube containing a  $350 \pm 22$  nm excitation filter, a  $460 \pm 25$  nm emission filter, and a 400 nm dichroic mirror. All fluorescence images were collected with a 1000 ms integration time.

**Image analysis:** Each image was analyzed with ImageJ, using a previously described process. First, each fluorescence image was thresholded using the Otso method. Next, particles in close

proximity were separated using a watershed process. Lastly, the cells were analyzed using the 'analyze particles' function with a size setting of 10-inifinte pixel range and 0-1.00 circularity range. **Table S2.** Percentage of viable cells at each oxygen tension.<sup>a</sup>

**Table S2.** Percentage of viable cells at each oxygen tension. <sup>a</sup>

|                                              | <b>20% O<sub>2</sub></b> | <b>8% O<sub>2</sub></b> | <b>3% O<sub>2</sub><sup>b</sup></b> |
|----------------------------------------------|--------------------------|-------------------------|-------------------------------------|
| <b>Percentage live</b><br>FDA/(FDA+PI)       | 89.9 +/- 3.5             | 90.9 +/- 2.0            | 42.4 +/- 13.9                       |
| <b>Percentage not dead</b><br>1-(PI/Hoechst) | 89.7 +/- 3.9             | 94.0 +/- 1.4            | 97.2 +/- 0.7                        |

<sup>a</sup> Cells were stained with a combination of calcein-AM, PI, and Hoechst 33342.

<sup>b</sup> At 20 and 8% O<sub>2</sub> both viability calculations, percent live and percent not dead, were statistically equivalent. However, the percent live calculation for 3% O<sub>2</sub> isn't equivalent to the percentage not dead; this observation has been observed by Kang et al. who stained hepatocytes with Calcein-AM along an oxygen gradient (6.9% and 0.3% O<sub>2</sub>). At low oxygen tensions the 40-50% of the cells did not stain with Calcein-AM.

**Table S3.** Statistical comparison of EC<sub>50</sub> between culture conditions and oxygen tensions. <sup>a</sup>

EC<sub>50</sub> Acetaminophen F-Test

| 2D 20% O <sub>2</sub> | 2D 8% O <sub>2</sub> | 2D 3% O <sub>2</sub> | 3D 20% O <sub>2</sub> | 3D 8% O <sub>2</sub> | 3D 3% O <sub>2</sub> |                       |
|-----------------------|----------------------|----------------------|-----------------------|----------------------|----------------------|-----------------------|
|                       | *                    | *                    | *                     |                      |                      | 2D 20% O <sub>2</sub> |
|                       |                      | NS                   |                       | *                    |                      | 2D 8% O <sub>2</sub>  |
|                       |                      |                      |                       |                      | NS                   | 2D 3% O <sub>2</sub>  |
|                       |                      |                      |                       | *                    | NS                   | 3D 20% O <sub>2</sub> |
|                       |                      |                      |                       |                      | NS                   | 3D 8% O <sub>2</sub>  |
|                       |                      |                      |                       |                      |                      | 3D 3% O <sub>2</sub>  |

EC<sub>50</sub> Cyclophosphamide F-Test

| 2D 20% O <sub>2</sub> | 2D 8% O <sub>2</sub> | 2D 3% O <sub>2</sub> | 3D 20% O <sub>2</sub> | 3D 8% O <sub>2</sub> | 3D 3% O <sub>2</sub> |                       |
|-----------------------|----------------------|----------------------|-----------------------|----------------------|----------------------|-----------------------|
|                       | *                    | *                    | *                     |                      |                      | 2D 20% O <sub>2</sub> |
|                       |                      | NS                   |                       | NS                   |                      | 2D 8% O <sub>2</sub>  |
|                       |                      |                      |                       |                      | *                    | 2D 3% O <sub>2</sub>  |
|                       |                      |                      |                       | *                    | NS                   | 3D 20% O <sub>2</sub> |
|                       |                      |                      |                       |                      | *                    | 3D 8% O <sub>2</sub>  |
|                       |                      |                      |                       |                      |                      | 3D 3% O <sub>2</sub>  |

EC<sub>50</sub> Aflatoxin B1 F-Test

| 2D 20% O <sub>2</sub> | 2D 8% O <sub>2</sub> | 2D 3% O <sub>2</sub> | 3D 20% O <sub>2</sub> | 3D 8% O <sub>2</sub> | 3D 3% O <sub>2</sub> |                       |
|-----------------------|----------------------|----------------------|-----------------------|----------------------|----------------------|-----------------------|
|                       | NS                   | NS                   | NS                    |                      |                      | 2D 20% O <sub>2</sub> |
|                       |                      | *                    |                       | NS                   |                      | 2D 8% O <sub>2</sub>  |
|                       |                      |                      |                       |                      | *                    | 2D 3% O <sub>2</sub>  |
|                       |                      |                      |                       | *                    | *                    | 3D 20% O <sub>2</sub> |
|                       |                      |                      |                       |                      | NS                   | 3D 8% O <sub>2</sub>  |
|                       |                      |                      |                       |                      |                      | 3D 3% O <sub>2</sub>  |

<sup>a</sup> \* indicates a P-value <0.05. NS indicates not significant.



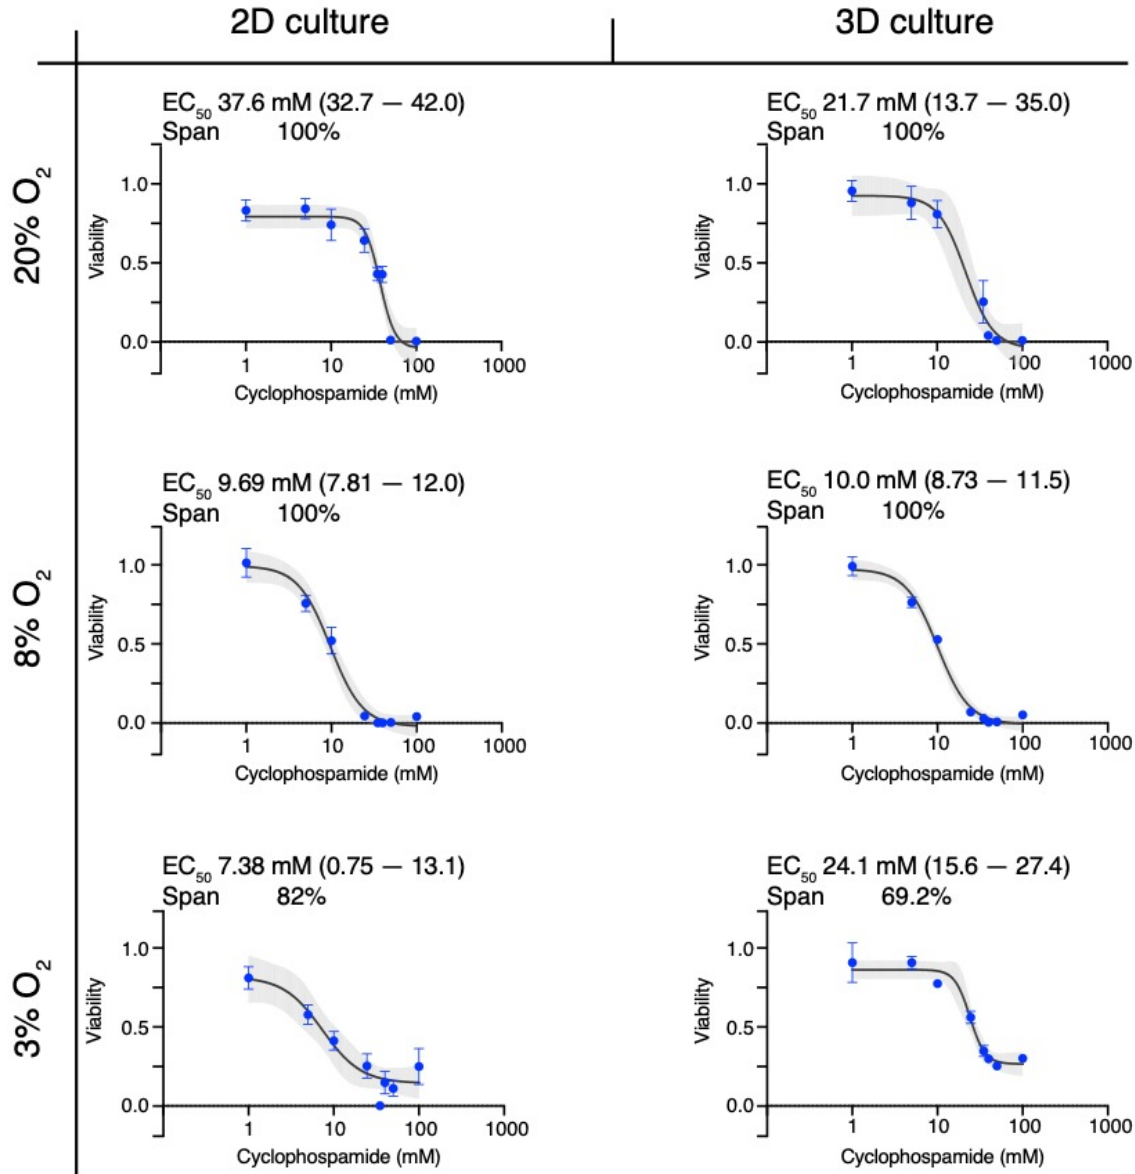

**Figure S4.** Dose-response relationships of 40,000 HepG2 cells in monolayer or 3D cultures after a 48 h exposure to cyclophosphamide at atmospheric (20%), periportal (8%), or perivenous (3%) oxygen tensions. Plotted points are the average and SEM of at least six data points collected from different cell passages (N=2-3) with each pass containing at least three technical replicates (n=3). The black lines connecting the points represent the best-fit 4PL model and the gray shaded areas represent the 95% confidence intervals of those fits.

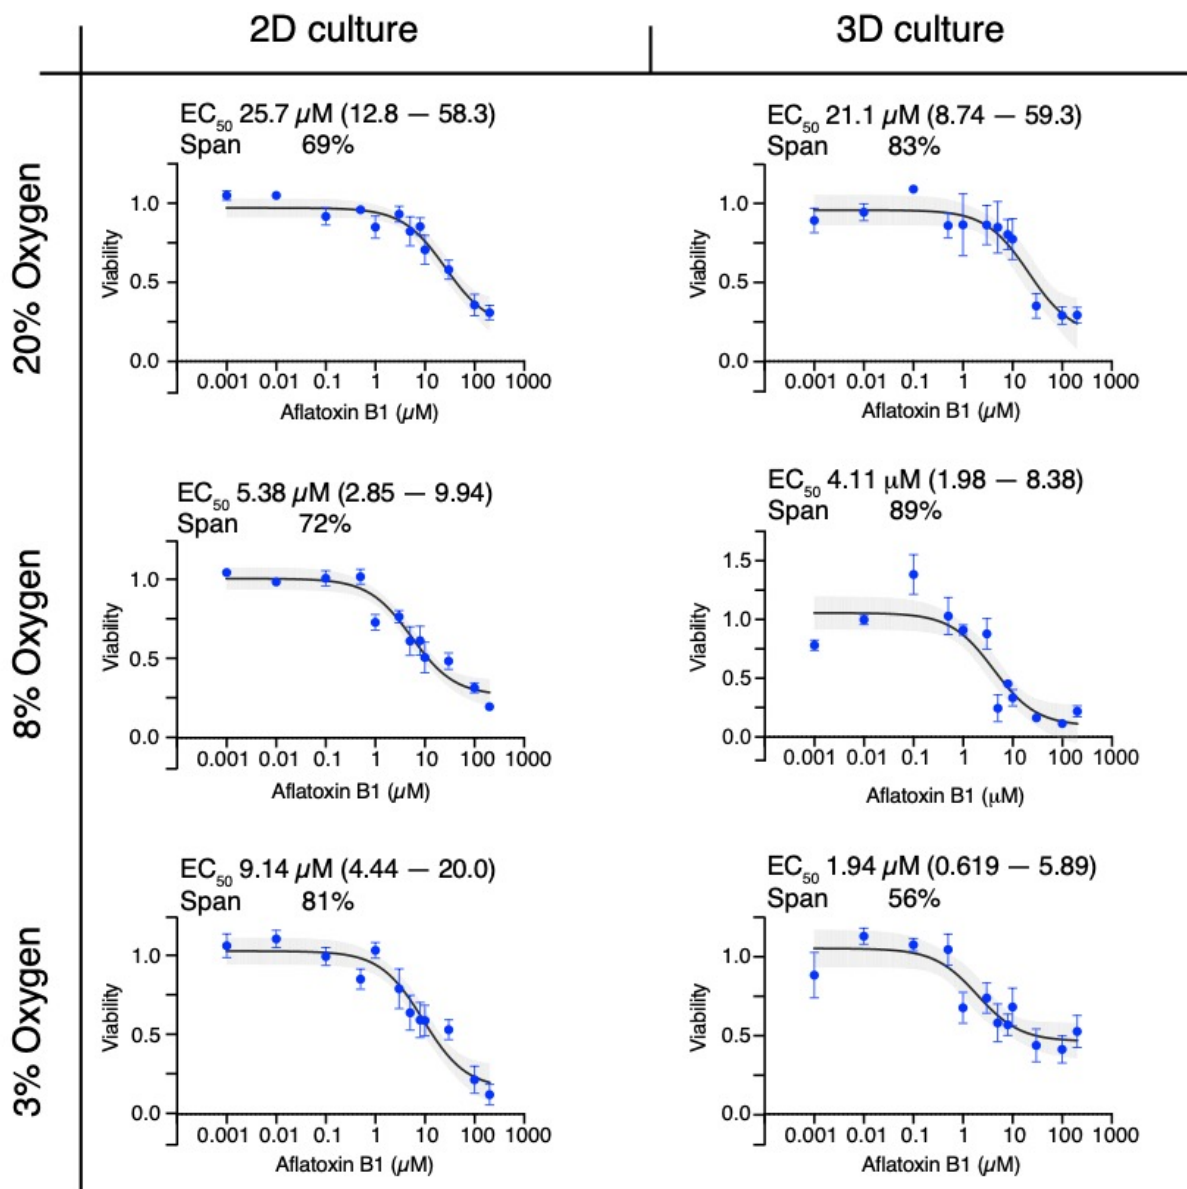

**Figure S5.** Dose-response relationships of 40,000 HepG2 cells in monolayer or 3D cultures after a 48 h exposure to aflatoxin B1 at atmospheric (20%), periportal (8%), or perivenous (3%) oxygen tensions. Plotted points are the average and SEM of at least six data points collected from different cell passages (N=2-3) with each pass containing at least three technical replicates (n=3). The black lines connecting the points represent the best-fit 3 PL model and the gray shaded areas represent the 95% confidence intervals of those fits.

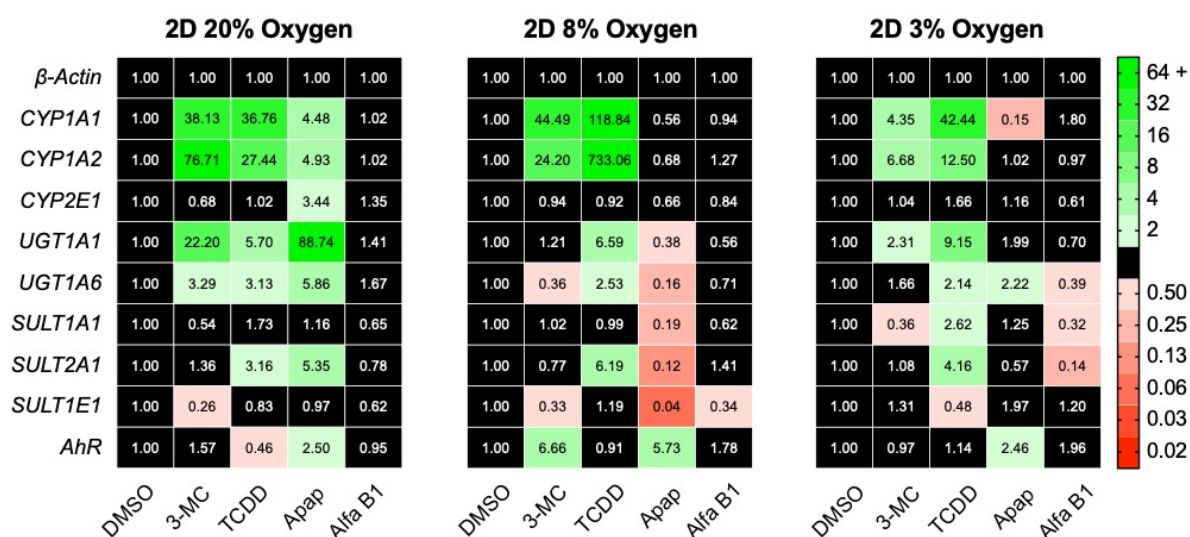

**Figure S6.** Transcript-level regulation of HepG2 cells cultured in a 2D culture format, plated on traditional plasticware after a 48 h incubation at 20%, 8%, or 3% O<sub>2</sub>. The cells were treated with 5 μM 3-MC, 1 nM TCDD, 10 mM acetaminophen (apap), or 10 nM aflatoxin B1 (afla B1). Each value is the fold change of the average  $\Delta\Delta C_t$  value of at least 4 datapoints collected from different cell passages (N=2-3), each pass contained at least three technical replicates (n=3). A fold-change >2 indicates a significant increase in expression; <-2 indicates a significant decrease. The numerical values are the average  $\Delta\Delta C_t$  values.

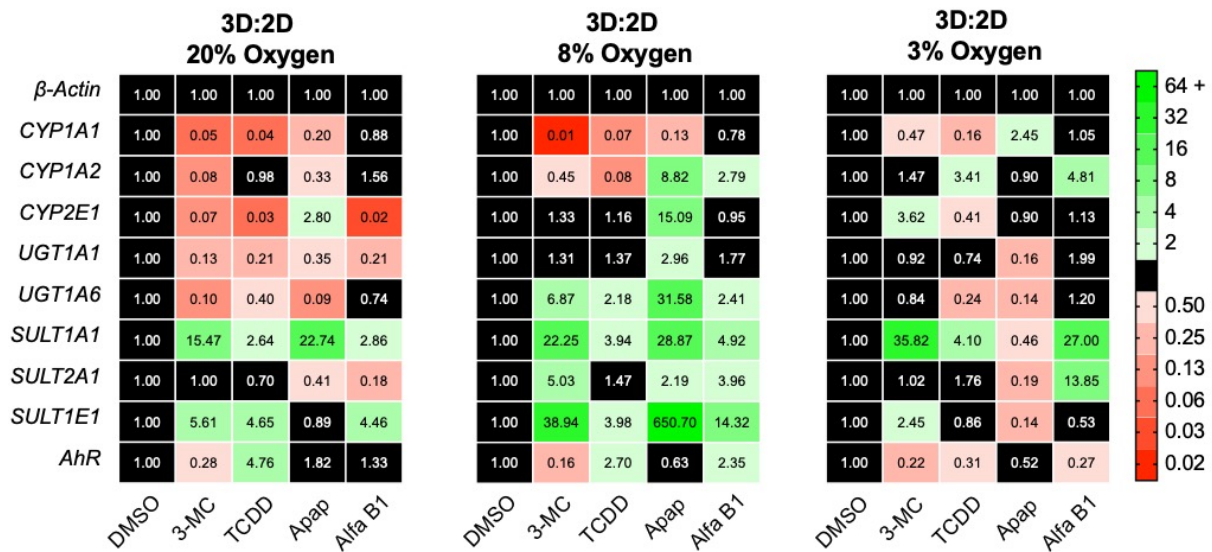

**Figure S7.** Transcript-level regulation ratio of 3D to 2D HepG2 cells cultured for a 48 h incubation at atmospheric (20%), periportal (8%), or perivenous (3%) oxygen tension. The cells were treated with 5  $\mu$ M 3-MC, 1 nM TCDD, 10 mM acetaminophen (apap), or 10 nM aflatoxin B1 (afla B1). Each value is the fold change of the average 3D  $\Delta\Delta$ Ct divided by the 2D  $\Delta\Delta$ Ct value of at least 4 datapoints collected from different cell passages (N=2 – 3), each pass contained at least three technical replicates (n=3). A fold-change >2 indicates a significant increase in expression; <-2 indicates a significant decrease. The numerical values labels represent the average  $\Delta\Delta$ Ct value.

**Table S4.** Numerical values of CYP1A fold induction corresponding Figure 6b.

|                    | <b>2D 20% O<sub>2</sub></b> | <b>3D 20% O<sub>2</sub></b> | <b>2D 8% O<sub>2</sub></b> | <b>3D 8% O<sub>2</sub></b> | <b>2D 3% O<sub>2</sub></b> | <b>3D 3% O<sub>2</sub></b> |
|--------------------|-----------------------------|-----------------------------|----------------------------|----------------------------|----------------------------|----------------------------|
| <b>Basal</b>       | 0.96                        | 1.18                        | 0.79                       | 0.95                       | 1.03                       | 0.74                       |
| <b>0.1% DMSO</b>   | 0.98                        | 0.96                        | 1.00                       | 1.00                       | 1.00                       | 1.01                       |
| <b>0.1 nM TCDD</b> | 12.64                       | 1.74                        | 1.08                       | 0.94                       | 2.58                       | 0.74                       |
| <b>1 nM TCDD</b>   | 12.89                       | 2.05                        | 2.63                       | 0.80                       | 2.99                       | 0.93                       |
| <b>10 nM TCDD</b>  | 17.57                       | 2.22                        | 1.95                       | 0.81                       | 3.55                       | 0.58                       |
| <b>1 μM 3-MC</b>   | 16.16                       | 1.32                        | 1.43                       | 1.02                       | 3.72                       | 0.78                       |
| <b>3 μM 3-MC</b>   | 13.55                       | 1.84                        | 2.19                       | 0.80                       | 2.52                       | 0.78                       |
| <b>5 μM 3-MC</b>   | 11.08                       | 3.56                        | 11.33                      | 1.22                       | 2.19                       | 0.88                       |

**Calculation 1.** The following equations calculate the oxygen at the surface of cells in the monolayer formats, as described previously by Al-Ani et al., (2018) Oxygenation in cell culture: Critical parameters are routinely not reported, *PLoS One*, 13 (10), e0204269.

**Eqn 1.** Oxygen delivered to the surface of the cell per second ( $mol/s * cm^2$ )

$$\text{Maximum deliverable oxygen} = \frac{\text{Diffusion coefficient of } O_2 \text{ in medium}}{(\text{Medium depth}) * 1000} * \text{Surface oxygen tension}$$

**Eqn 2.** Cellular oxygen requirement ( $mol/s * cm^2$ )

$$\text{Cellular oxygen requirements} = (O_2 \text{ consumption} * \text{Cell density}) * 10^{-18}$$

**Eqn 3.** Oxygen concentration at liquid surface ( $mol/L$ )

$$\text{Oxygen at liquid surface} = (1 - \%CO_2 - 0.06) * \text{Atmospheric pressure} * \%O_2 * \left( \frac{O_2 \text{ Solubility in medium}}{0.209} \right)$$

**Eqn 4.** Oxygen concentration at cell surface ( $mol/L$ )

$$\text{Oxygen at cell surface} = (O_2 \text{ at liquid surface}) * \left( 1 - \frac{\text{Cellular } O_2 \text{ requirement}}{\text{Deliverable } O_2} \right)$$

**Constants used in each equation**

|                                                                    |                                          |
|--------------------------------------------------------------------|------------------------------------------|
| Molar percentage of CO <sub>2</sub>                                | 5.0 %                                    |
| Atmospheric pressure                                               | 1.00 atm                                 |
| Medium depth                                                       | 0.361 cm                                 |
| <i>Corresponds to 100 μL of medium in a standard 96 well plate</i> |                                          |
| Oxygen consumption rate                                            | 34 amol/cell*s                           |
| Cell density                                                       | 125,000 cells/cm <sup>2</sup>            |
| Diffusion constant of O <sub>2</sub>                               | 2.86x10 <sup>-5</sup> cm <sup>2</sup> /s |
| Oxygen solubility                                                  | 2.00x10 <sup>-4</sup> mol/L              |

**O<sub>2</sub> at cell surface when incubator at 20% O<sub>2</sub>.**

$$\text{Oxygen at liquid surface} = 1.78 \times 10^{-4} \text{ mol/L}$$

$$\text{Cellular oxygen requirements} = 4.25 \times 10^{-12} \text{ mol/cm}^2 * s$$

$$\text{Maximum deliverable oxygen} = 1.41 \times 10^{-11} \text{ mol/cm}^2 * s$$

$$\text{Oxygen at cell surface} = 1.24 \times 10^{-4} \text{ mol/L}$$

**O<sub>2</sub> at cell surface when incubator at 8% O<sub>2</sub>.**

$$\text{Oxygen at liquid surface} = 6.81 \times 10^{-5} \text{ mol/L}$$

$$\text{Maximum deliverable oxygen} = 5.40 \times 10^{-12} \text{ mol/cm}^2 * s$$

$$\text{Oxygen at cell surface} = 1.45 \times 10^{-5} \text{ mol/L}$$

**O<sub>2</sub> at cell surface when incubator at 3% O<sub>2</sub>.**

$$\text{Oxygen at liquid surface} = 2.56 \times 10^{-5} \text{ mol/L}$$

$$\text{Maximum deliverable oxygen} = 2.02 \times 10^{-12} \text{ mol/cm}^2 * s$$

$$\text{Oxygen at cell surface} = -2.81 \times 10^{-5} \text{ mol/L}^\dagger$$

<sup>†</sup> A negative value indicates that there is  $\leq 50\%$  oxygen deficiency for the cells.
